# Supplementary material
Source: PubMed Central journal article supplement (PMC3359870)
Supplement: NIHMS332017-supplement-01.pdf [file NIHMS332017-supplement-01.pdf]

**LIST OF TABLES AND SUPPLEMENTAL TABLES****TABLES**

**Table 1. Number of deaths (N) and person-years (PY) at risk by cause of death for total population, white population, and populations of color, United States, 1960-2006.**

**Table 2. (a) Mortality unrelated to smoking, and (b) mortality preventable by 1960s standards of medical care: incidence rate ratio (IRR) and incidence rate difference (IRD) by county income quintile, and population attributable fraction (PAF), for total population, white population, and populations of color: United States, 1960, 1970, 1980, 1990, 2000, and 2006.**

**SUPPLEMENTAL TABLES**

**Supplemental Table 1: International Classification of Disease (ICD) codes for causes of death used in analyses: ICD-7 (1958-1967) through ICD-10 (1999 to present).**

**Supplemental Table 2: Cut-points for county income quintiles, United States, decennial census 1960 through 2000.**

**Supplemental Table 3: Top 10 leading causes of death, United States, 1960 and 2006.**

| <b>Supplemental Table 1: International Classification of Disease (ICD) codes<sup>9</sup> for causes of death used in analyses: ICD-7 through ICD-10.</b> |                                             |                           |                                   |                              |
|----------------------------------------------------------------------------------------------------------------------------------------------------------|---------------------------------------------|---------------------------|-----------------------------------|------------------------------|
| <b>Cause of death</b>                                                                                                                                    | <b>ICD-7 (1958-1967)</b>                    | <b>ICD-8 (1968-1978)</b>  | <b>ICD-9 (1979-1998)</b>          | <b>ICD-10 (1999-present)</b> |
| <b>Preventable by medical care*</b>                                                                                                                      |                                             |                           |                                   |                              |
| Tuberculosis                                                                                                                                             | 001-008, 010-019                            | 011-019                   | 010-108,137                       | A15-A19                      |
| Cervical cancer                                                                                                                                          | 171                                         | 180                       | 180                               | C53                          |
| Hodgkin's disease                                                                                                                                        | 201                                         | 201                       | 201                               | C81                          |
| Rheumatic heart disease                                                                                                                                  | 410-416                                     | 393-398                   | 393-398                           | I05-I09                      |
| Hypertensive heart disease                                                                                                                               | 440-447                                     | 400-404                   | 401-405                           | I11                          |
| Cerebrovascular disease                                                                                                                                  | 330-334                                     | 430-438                   | 430-438                           | I60-I69                      |
| Acute respiratory disease                                                                                                                                | 470-475                                     | 460-466                   | 460-466                           | J00-J06                      |
| Pneumonia & bronchitis                                                                                                                                   | 480, 490-493, 500-502                       | 480-486, 490-491          | 480-486, 490-491                  | J11.0, J12-J18, J20-J22      |
| Influenza                                                                                                                                                | 480-483                                     | 470-474                   | 487                               | J10-J11                      |
| Asthma                                                                                                                                                   | 241                                         | 493                       | 493                               | J45                          |
| Appendicitis                                                                                                                                             | 550-553                                     | 540-543                   | 540-543                           | K35-K37                      |
| Inguinal hernias                                                                                                                                         | 560-561                                     | 550-553                   | 550-553                           | K40                          |
| Cholecystitis                                                                                                                                            | 585-585                                     | 574-575                   | 574-575.1                         | K81                          |
| <b>Smoking-related mortality**</b>                                                                                                                       |                                             |                           |                                   |                              |
| <b>Malignant neoplasm</b>                                                                                                                                |                                             |                           |                                   |                              |
| lip, oral cavity, pharynx                                                                                                                                | 140-148                                     | 140-149                   | 140-149                           | C00-C14                      |
| esophagus                                                                                                                                                | 150                                         | 150                       | 150                               | C15                          |
| stomach                                                                                                                                                  | 151                                         | 151                       | 151                               | C16                          |
| pancreas                                                                                                                                                 | 157                                         | 157                       | 157                               | C25                          |
| trachea/lung/bronchus                                                                                                                                    | 162                                         | 162                       | 162                               | C33-C34                      |
| cervix uteri                                                                                                                                             | 171                                         | 180                       | 180                               | C53                          |
| kidney and renal pelvis                                                                                                                                  | 180                                         | 189.0-189.1, 180.2        | 189.0-189.1, 180.2                | C64-C65                      |
| urinary bladder                                                                                                                                          | 181                                         | 188, 189.9                | 188, 189.3, 189.8, 189.9          | C67                          |
| acute myeloid leukemia                                                                                                                                   | 204.1, 204.3                                | 205.0                     | 205.0                             | C92.0                        |
| <b>Cardiovascular disease</b>                                                                                                                            |                                             |                           |                                   |                              |
| ischemic heart disease                                                                                                                                   | 420, 422.1                                  | 410-414                   | 410-414                           | I20-I25                      |
| other heart disease                                                                                                                                      | 400-402, 410-416, 440-443, 420-422, 430-434 | 393-398, 402,404, 420-429 | 393-398, 402,404,415-417, 420-429 | I00-I09, I26-I51             |
| cerebrovascular disease                                                                                                                                  | 330-334                                     | 430-438                   | 430-438                           | I60-I69                      |
| arteriosclerosis                                                                                                                                         | 450                                         | 440                       | 440                               | I70-I71                      |
| aortic aneurysm                                                                                                                                          | 451                                         | 441                       | 441                               | I71                          |
| other circulatory disease                                                                                                                                | 452-456, 460-468                            | 442-448, 450-458          | 442-448, 451-458                  | I72-I79, I80-I89             |
| <b>Respiratory disease</b>                                                                                                                               |                                             |                           |                                   |                              |
| pneumonia, influenza                                                                                                                                     | 480-483, 490-493                            | 480-486, 470-474          | 480-487                           | J10-J18                      |
| bronchitis, emphysema                                                                                                                                    | 500-502, 527.1                              | 490-492                   | 490-492                           | J40-J42, J43                 |
| chronic airways obstruction                                                                                                                              | N/A                                         | N/A                       | 496                               | J44                          |
| <b>Perinatal conditions</b>                                                                                                                              |                                             |                           |                                   |                              |
| Short gestation/low birth weight                                                                                                                         | N/A                                         | N/A                       | 765                               | P07                          |
| Respiratory distress syndrome                                                                                                                            | N/A                                         | N/A                       | 769                               | P22                          |
| Other respiratory (newborn)                                                                                                                              | N/A                                         | N/A                       | 770                               | P23-P28                      |

|                                   |                      |                                    |                      |                           |
|-----------------------------------|----------------------|------------------------------------|----------------------|---------------------------|
| Sudden Infant Death Syndrome      | N/A                  | N/A                                | N/A                  | R95                       |
| <b>Residential Fire</b>           |                      |                                    |                      |                           |
| <b>Secondhand smoke</b>           |                      |                                    |                      |                           |
| lung cancer                       | 162                  | 162                                | 162                  | C33-C34                   |
| ischemic heart disease            | N/A                  | 410-414                            | 410-414              | I20-I25                   |
| <b>Additional causes of death</b> |                      |                                    |                      |                           |
| Ill-defined causes of death       | 780-795              | 780-796                            | 780-799              | R00-R99                   |
| colorectal cancer                 | 153-154              | 153-154                            | 153-154              | C18-C21                   |
| prostate cancer                   | 177                  | 185                                | 185                  | C61                       |
| breast cancer                     | 170                  | 174                                | 174-175              | C50                       |
| diabetes                          | 260                  | 250                                | 250                  | E10-E14                   |
| injuries                          | E800-E936, E960-E962 | E800-E845, E860-E929,<br>E940-E949 | E800-E869, E880-E929 | V01-V99, W00-W99, X00-X59 |
| homicide                          | E964                 | E960-E978                          | E960-E978            | X85-X99, Y00-Y09          |
| HIV/AIDS                          | N/A                  | N/A                                | 042-044              | B20-B24                   |

\* Referring to deaths preventable by medical intervention since at least 1960.<sup>11-13</sup>

\*\* As defined by the US Centers for Disease Control and Prevention and US Surgeon General<sup>10</sup>; all other causes of death categorized as “not smoking related”

NOTE In the case of stroke and ischemic heart disease (not included as such in ICD-7), we respectively employed the ICD-7 codes for vascular lesions affecting the central nervous system (330-334) and arteriosclerotic heart disease (420) and other myocardial degeneration with arteriosclerosis (422.1); for several outcomes the level of diagnostic specificity was determined by the earlier ICD codes, with coding also informed by previously published work on ICD comparability ratios.

| <b>Supplemental Table 2: Cut-points for county income quintiles, United States, decennial census 1960 through 2000.</b> |                                                                                                                        |                   |                   |                   |                                 |
|-------------------------------------------------------------------------------------------------------------------------|------------------------------------------------------------------------------------------------------------------------|-------------------|-------------------|-------------------|---------------------------------|
| <b>Year</b>                                                                                                             | <b>County median family income quintile cut-points: upper bound for each quintile expressed in that year's dollars</b> |                   |                   |                   |                                 |
|                                                                                                                         | <b>Quintile 1<br/>(lowest)</b>                                                                                         | <b>Quintile 2</b> | <b>Quintile 3</b> | <b>Quintile 4</b> | <b>Quintile 5<br/>(highest)</b> |
| 1960                                                                                                                    | \$12,020                                                                                                               | \$15,437          | \$18,300          | \$21,552          | \$38,445                        |
| 1970                                                                                                                    | \$18,479                                                                                                               | \$21,851          | \$24,974          | \$28,482          | \$57,707                        |
| 1980                                                                                                                    | \$24,522                                                                                                               | \$28,021          | \$31,232          | \$35,342          | \$73,665                        |
| 1990                                                                                                                    | \$24,391                                                                                                               | \$27,746          | \$30,722          | \$34,976          | \$68,510                        |
| 2000                                                                                                                    | \$36,125                                                                                                               | \$40,301          | \$44,449          | \$50,813          | \$101,823                       |

| <b>Supplemental Table 3: Top 10 leading causes of death, United States, 1960 and 2006.</b> |                                            |                                            |                                            |                                             |                                             |                                             |
|--------------------------------------------------------------------------------------------|--------------------------------------------|--------------------------------------------|--------------------------------------------|---------------------------------------------|---------------------------------------------|---------------------------------------------|
| <b>1960</b>                                                                                |                                            |                                            |                                            | <b>2006</b>                                 |                                             |                                             |
| <b>White male</b>                                                                          | <b>White female</b>                        | <b>Nonwhite male</b>                       | <b>Nonwhite female</b>                     | <b>Total</b>                                | <b>White</b>                                | <b>Black</b>                                |
| Diseases of heart                                                                          | Diseases of heart                          | Diseases of heart                          | Diseases of heart                          | Diseases of heart                           | Diseases of heart                           | Diseases of heart                           |
| Malignant neoplasms                                                                        | Malignant neoplasms                        | Malignant neoplasms                        | Vascular lesions of central nervous system | Malignant neoplasms                         | Malignant neoplasms                         | Malignant neoplasms                         |
| Vascular lesions of central nervous system                                                 | Vascular lesions of central nervous system | Vascular lesions of central nervous system | Malignant neoplasms                        | Cerebrovascular disease                     | Cerebrovascular disease                     | Cerebrovascular disease                     |
| Accidents                                                                                  | Accidents                                  | Accidents                                  | Certain diseases of early infancy          | Chronic lower respiratory disease           | Chronic lower respiratory disease           | Unintentional injury                        |
| Influenza and pneumonia                                                                    | Influenza and pneumonia                    | Certain disease of early infancy           | Influenza and pneumonia                    | Unintentional injury                        | Unintentional injury                        | Diabetes mellitus                           |
| Certain diseases of early infancy                                                          | Certain disease of early infancy           | Influenza and pneumonia                    | Accidents                                  | Diabetes mellitus                           | Alzheimer's disease                         | Homicide                                    |
| General arteriosclerosis                                                                   | General arteriosclerosis                   | Homicide                                   | Diabetes mellitus                          | Alzheimer's disease                         | Diabetes mellitus                           | Nephritis, nephritic syndrome and nephrosis |
| Suicide                                                                                    | Diabetes mellitus                          | Tuberculosis, all forms                    | General arteriosclerosis                   | Influenza & pneumonia                       | Influenza & pneumonia                       | Chronic lower respiratory disease           |
| Cirrhosis of liver                                                                         | Congenital malformations                   | Congenital malformations                   | Chronic and unspecified nephritis          | Nephritis, nephritic syndrome and nephrosis | Nephritis, nephritic syndrome and nephrosis | Human immunodeficiency virus (HIV) disease  |
| Other diseases of circulatory system                                                       | Other diseases of circulatory system       | Chronic and unspecified nephritis          | Other hypertensive disease                 | Septicemia                                  | Suicide                                     | Septicemia                                  |

Sources: (a) for 1960 data: National Center for Health Statistics. *Vital Statistics of the United States, 1960, Volume II – Mortality, Part A*. Washington, DC: US Department of Health, Education, and Welfare, 1963; (b) for 2006 data: National Center for Health Statistics. *Health, United States, 2009, with Special Feature on Medical Technology*. Hyattsville, MD: US Department of Health and Human Services, 2010 (Table 28).
